# Supplementary material for: Advantages of continuous genotype values over genotype classes for GWAS in higher polyploids: a comparative study in hexaploid chrysanthemum
Source: PubMed Central journal article supplement (PMC4995758; doi:10.1186/s12864-016-2926-5), 2016-08-24

### Disease

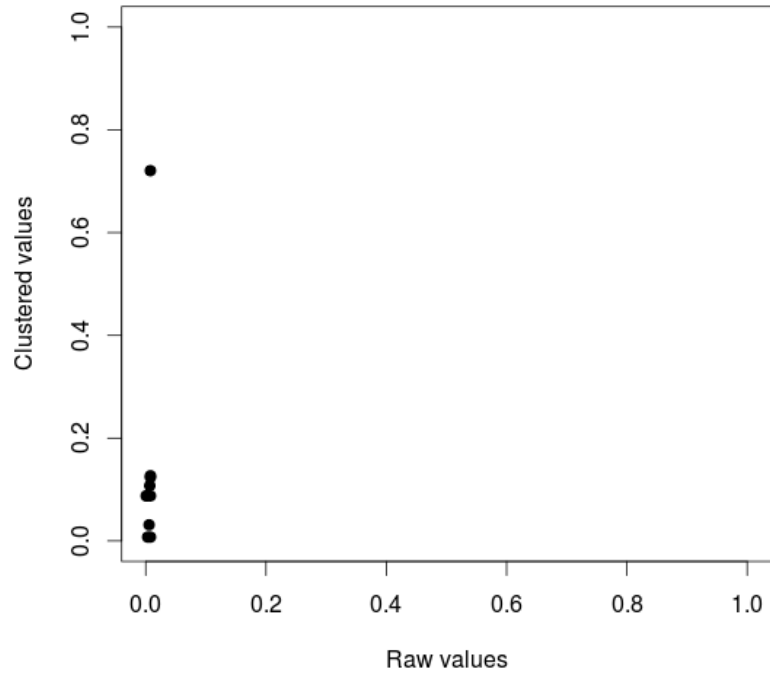

### Flowering

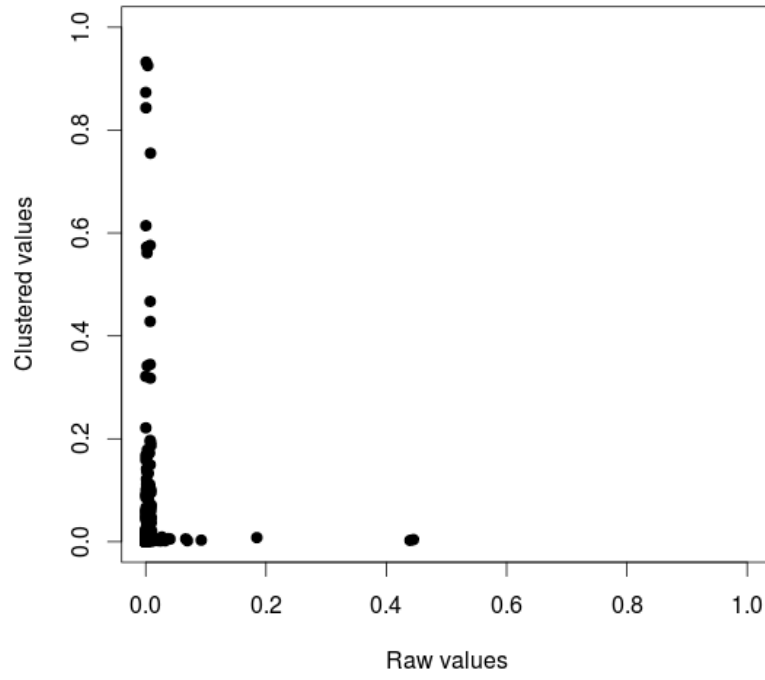

Supplement: 12864_2016_2926_MOESM2_ESM.pdf [file 12864_2016_2926_MOESM2_ESM.pdf]
