# Supplementary material for: Advantages of continuous genotype values over genotype classes for GWAS in higher polyploids: a comparative study in hexaploid chrysanthemum
Source: PubMed Central journal article supplement (PMC4995758; doi:10.1186/s12864-016-2926-5), 2016-08-24

## SuperMASSA genotype calling for disease trait markers

- AX-89299922
- AX-89251911
- AX-89296762
- AX-89279384
- AX-89244354
- AX-89257336
- AX-89253330
- AX-89231276
- AX-89238198
- AX-89264014

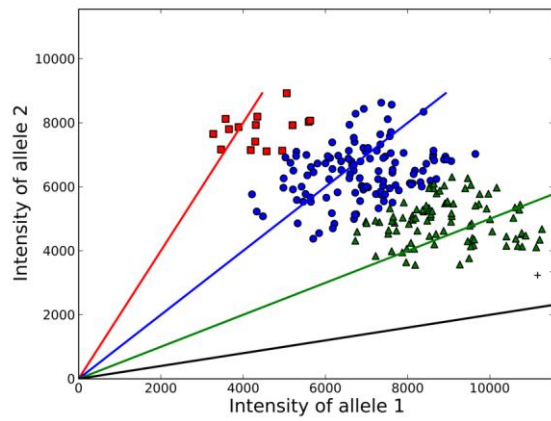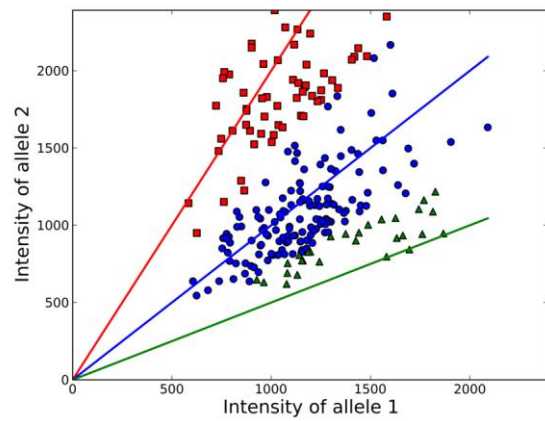

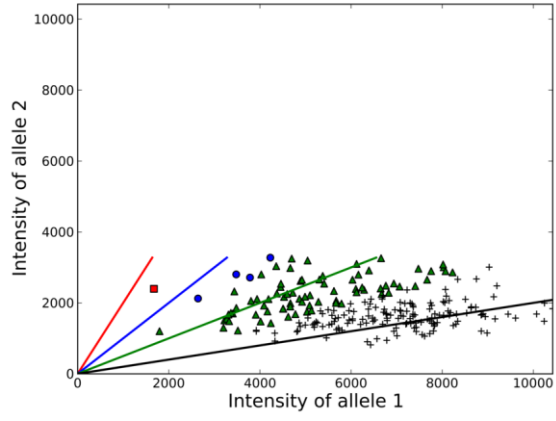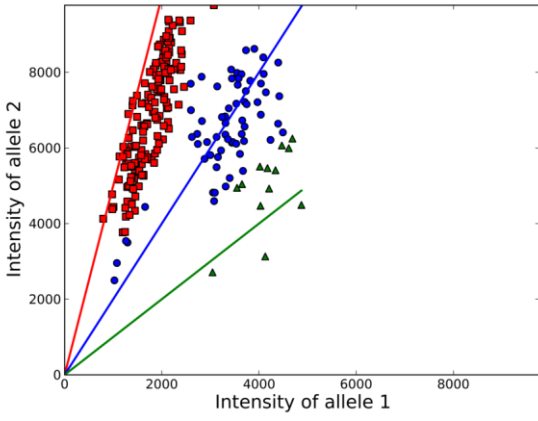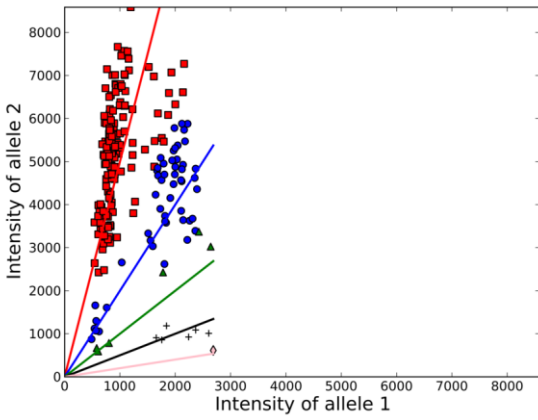

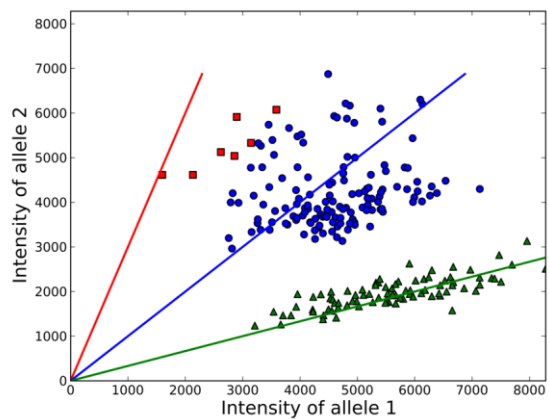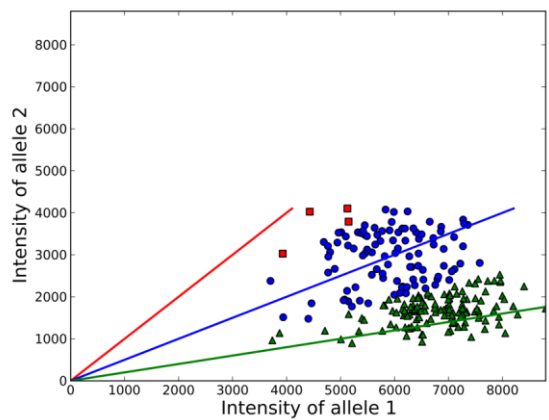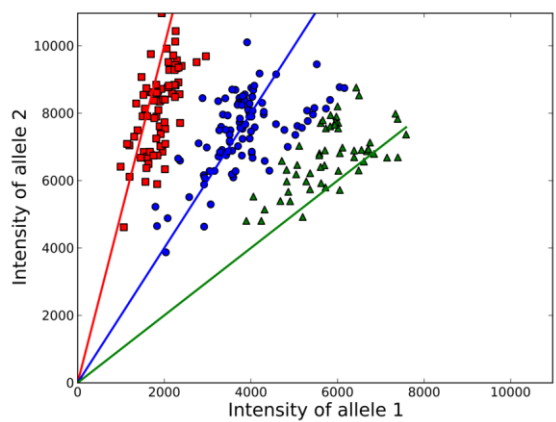

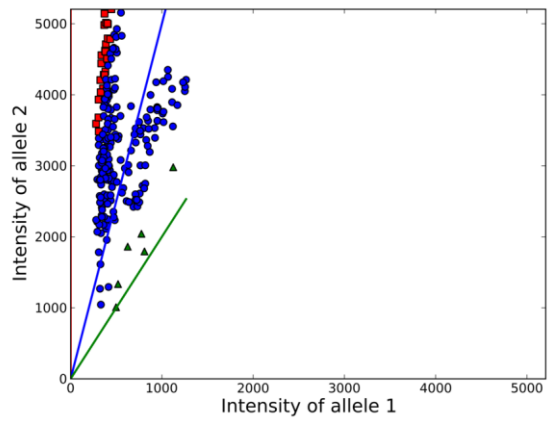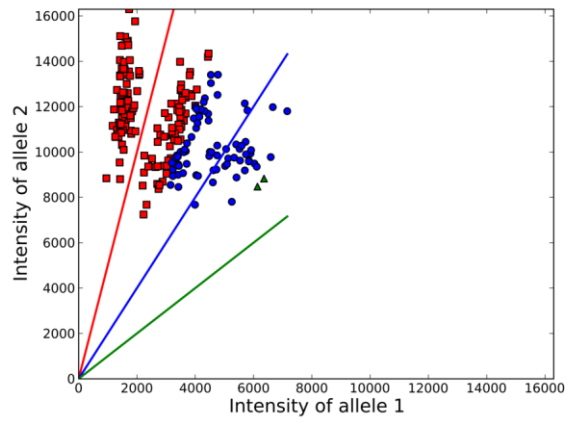

Supplement: 12864_2016_2926_MOESM3_ESM.pdf [file 12864_2016_2926_MOESM3_ESM.pdf]
