# Supplementary material for: Advantages of continuous genotype values over genotype classes for GWAS in higher polyploids: a comparative study in hexaploid chrysanthemum
Source: PubMed Central journal article supplement (PMC4995758; doi:10.1186/s12864-016-2926-5), 2016-08-24

## SuperMASSA genotype calling for flowering trait markers

- AX-89225990
- AX-89287826
- AX-89284793
- AX-89231611
- AX-89300609
- AX-89243551
- AX-89291422
- AX-89211288
- AX-89261288
- AX-89215144
- AX-89265144

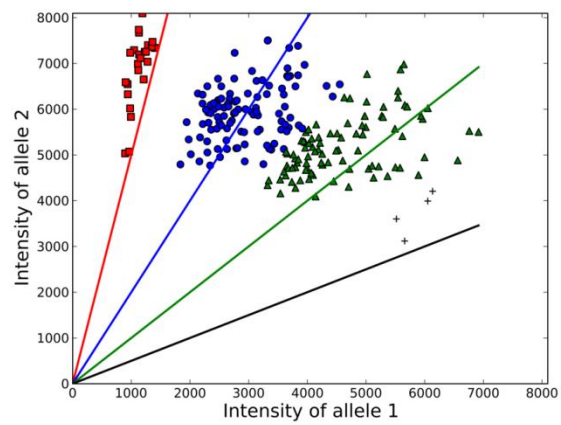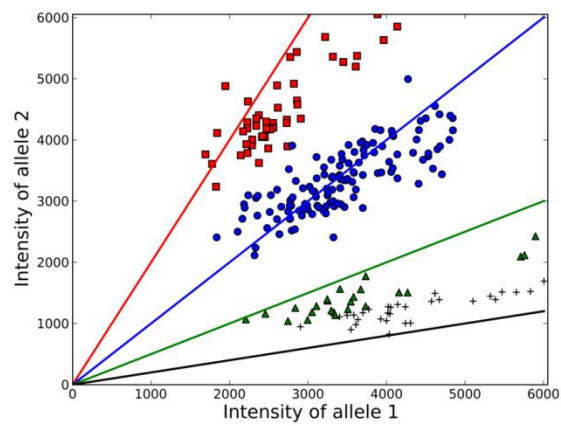

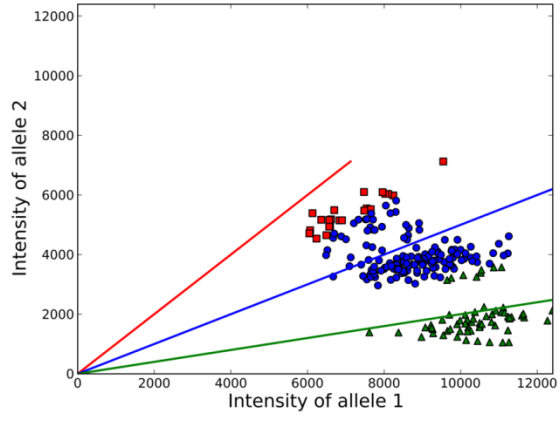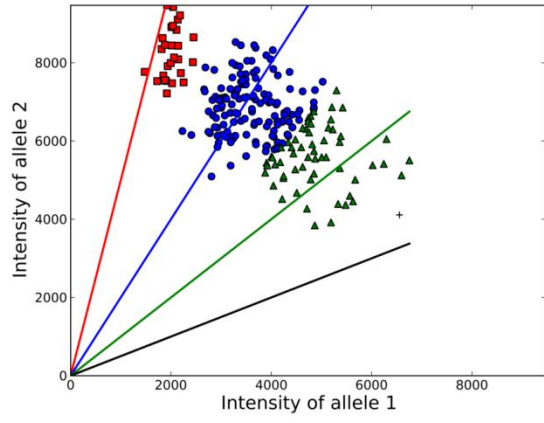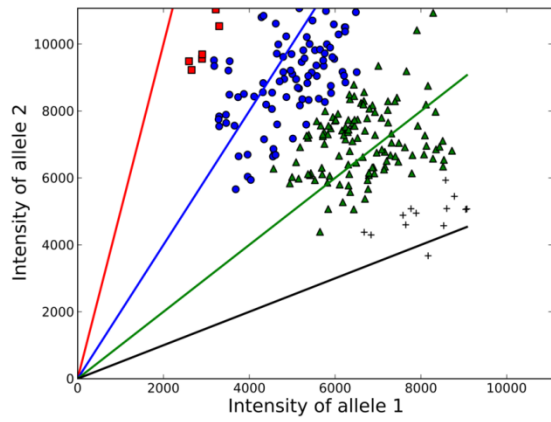

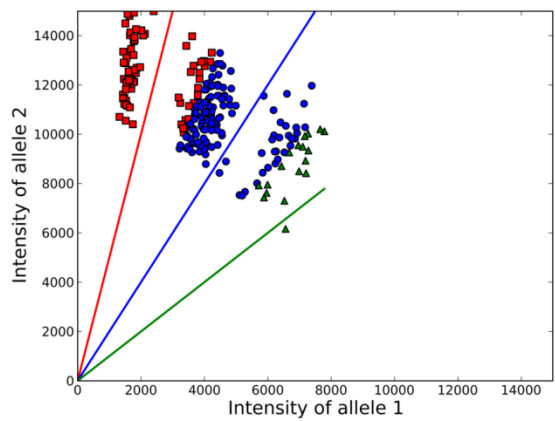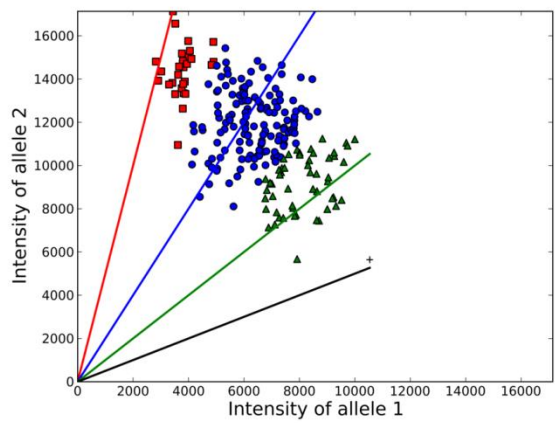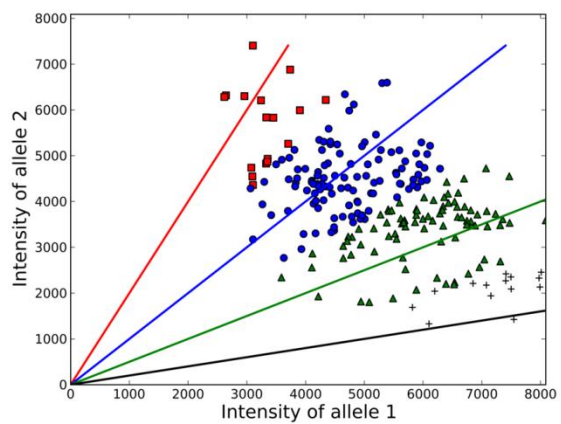

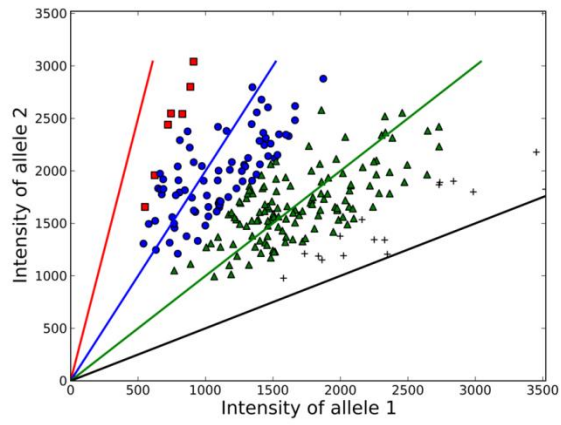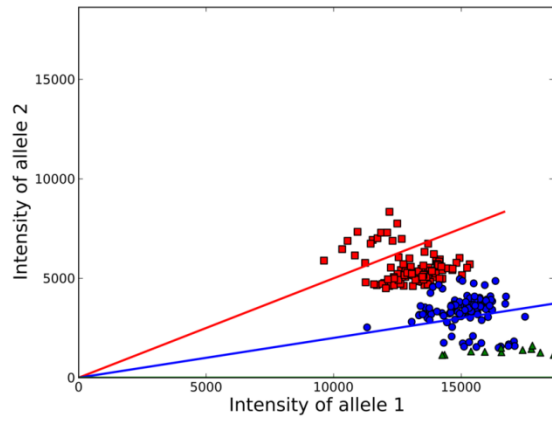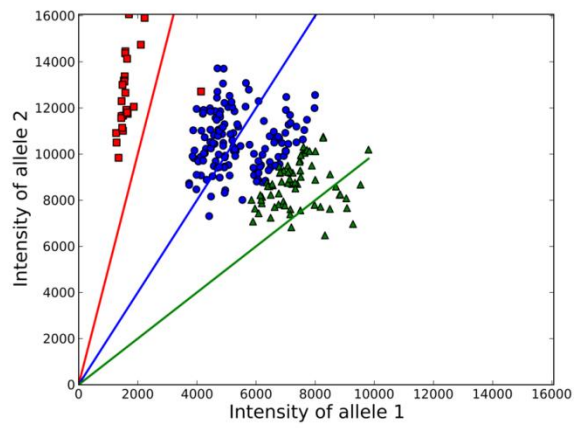

Supplement: 12864_2016_2926_MOESM4_ESM.pdf [file 12864_2016_2926_MOESM4_ESM.pdf]
