# Supplementary material for: Advantages of continuous genotype values over genotype classes for GWAS in higher polyploids: a comparative study in hexaploid chrysanthemum
Source: PubMed Central journal article supplement (PMC4995758; doi:10.1186/s12864-016-2926-5), 2016-08-24
Supplement: 12864_2016_2926_MOESM5_ESM.pdf [file 12864_2016_2926_MOESM5_ESM.pdf]

# Simulation study results

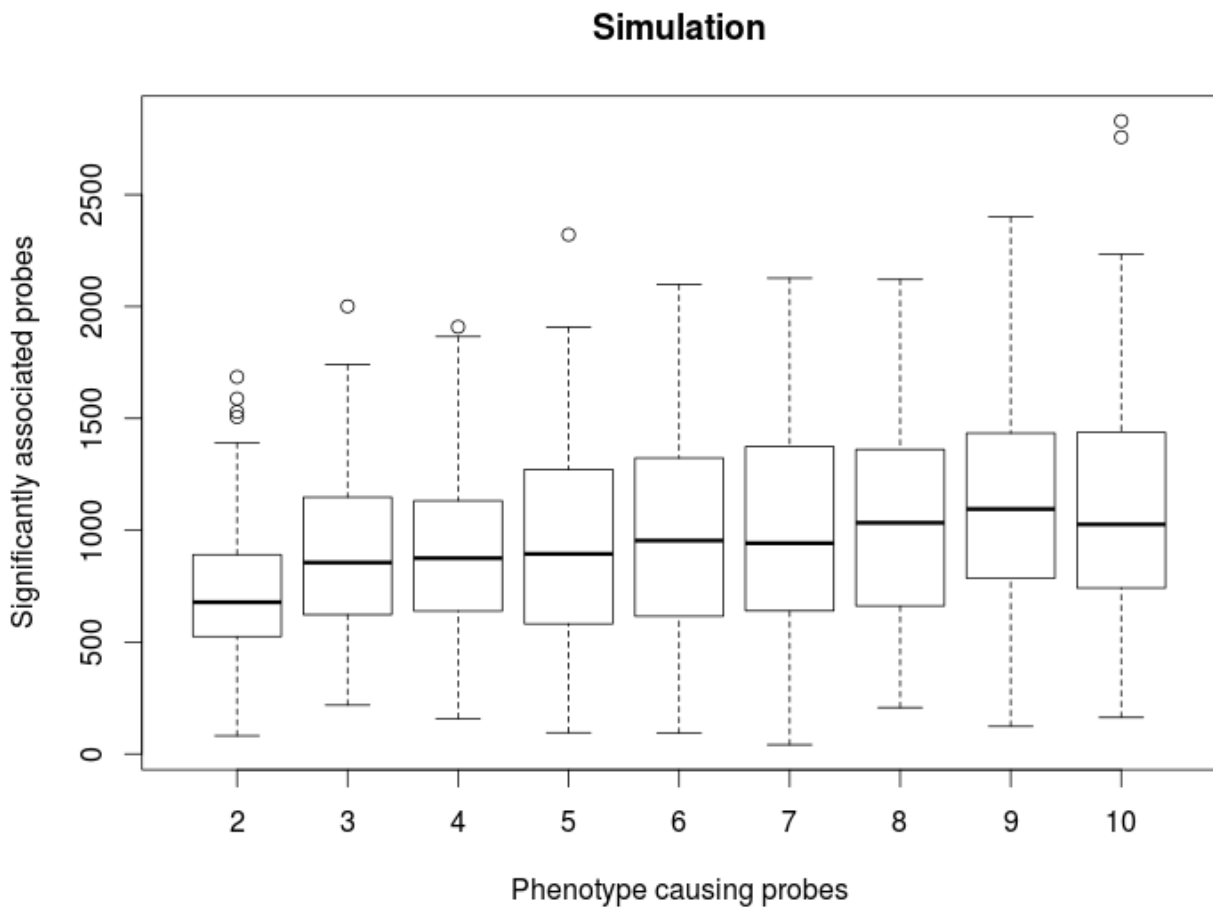

We simulated 9 datasets with 2 to 10 phenotype causing probes each. Each simulation was repeated 100 times. The boxplots show the distribution of significant probes per dataset. The circles and bold lines represent outliers and medians, respectively.
