# Supplementary material for: Advantages of continuous genotype values over genotype classes for GWAS in higher polyploids: a comparative study in hexaploid chrysanthemum
Source: PubMed Central journal article supplement (PMC4995758; doi:10.1186/s12864-016-2926-5), 2016-08-24

## SuperMASSA genotype calling for growth trait markers

- AX-89227964
- AX-89255868
- AX-89272774
- AX-89253659
- AX-89299519
- AX-89216469
- AX-89302464
- AX-89306355
- AX-89212314
- AX-89226287
- AX-89226270
- AX-89306258

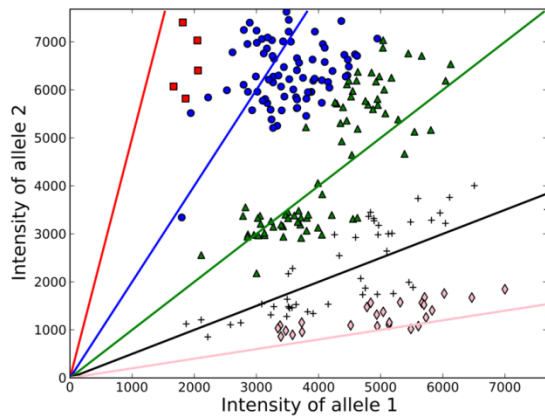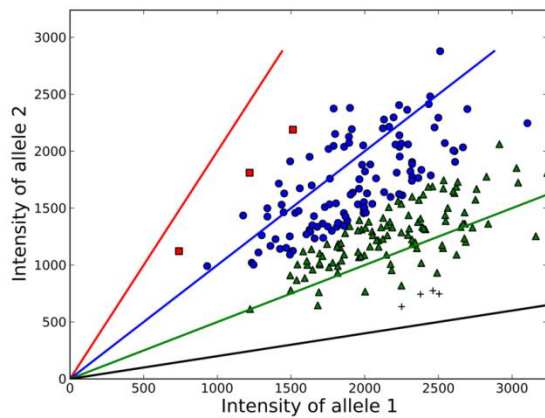

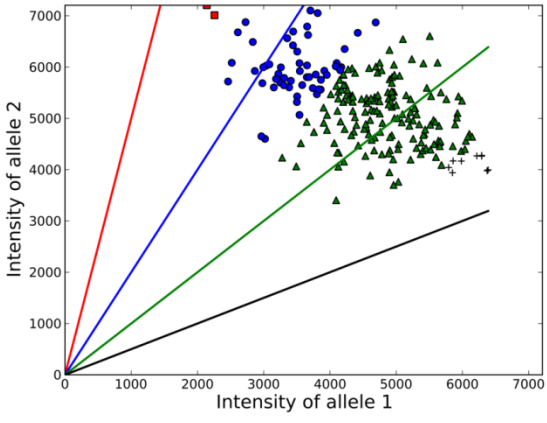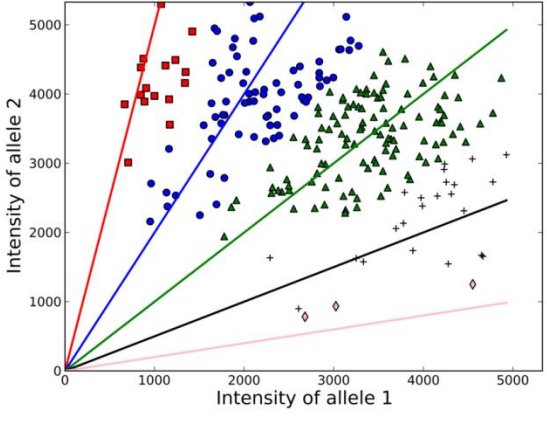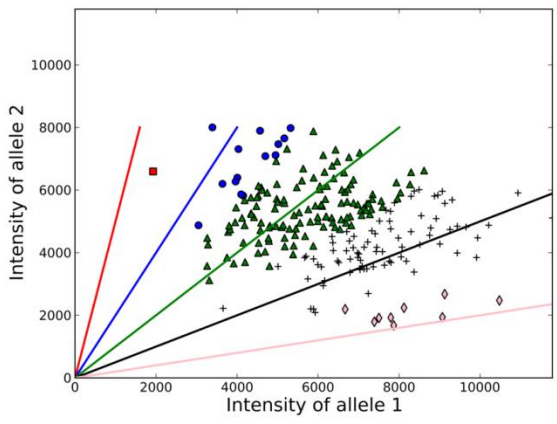

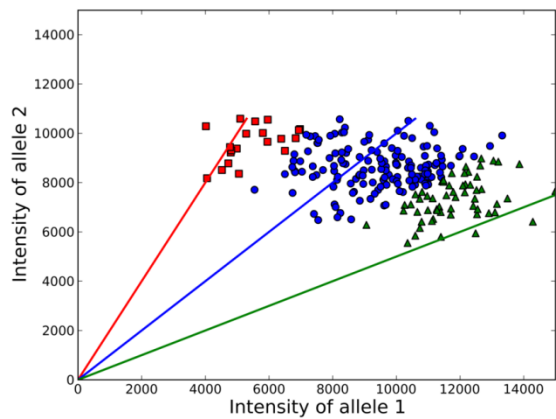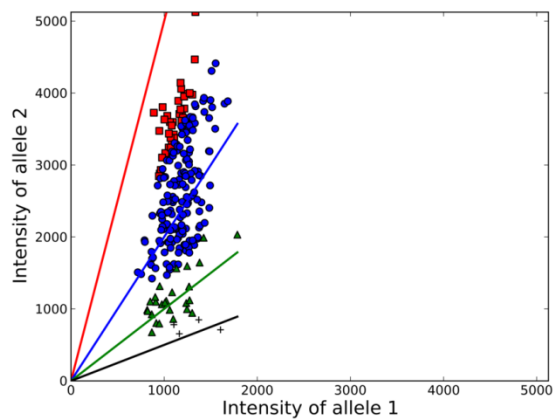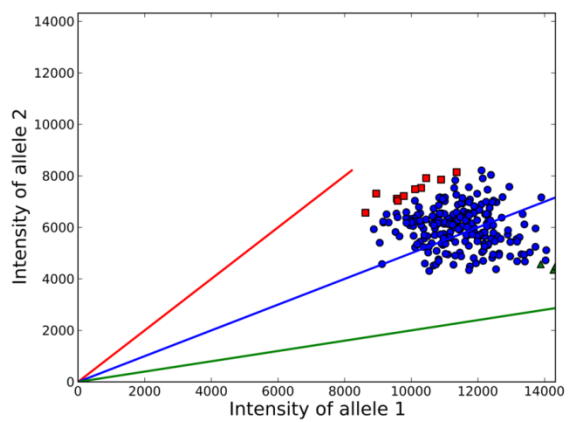

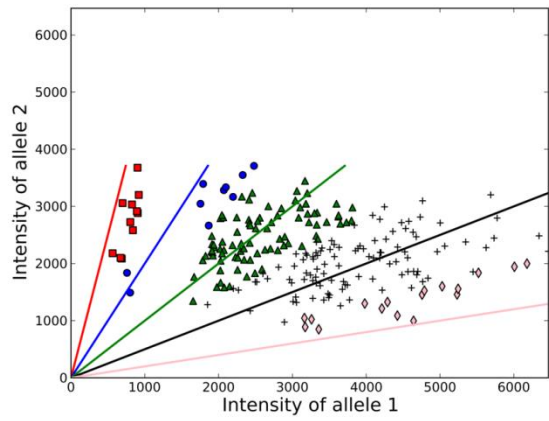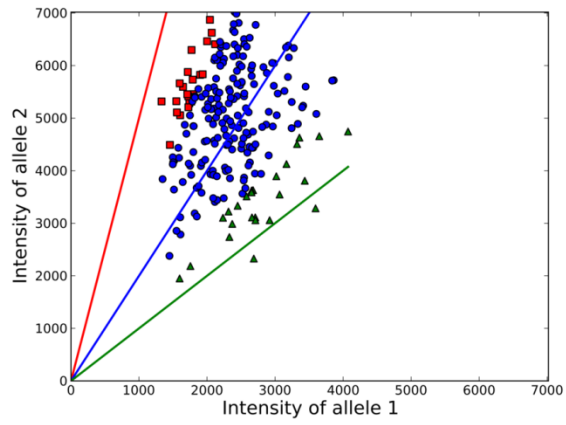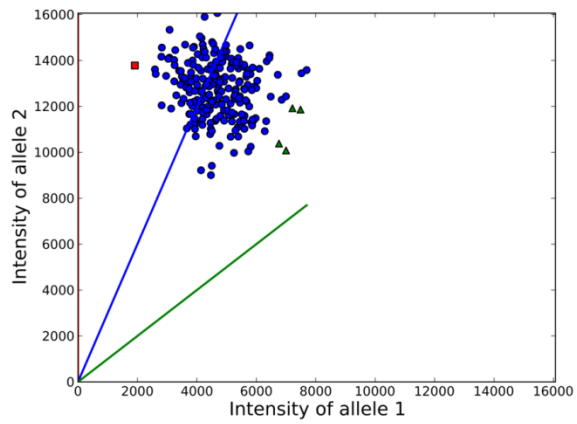

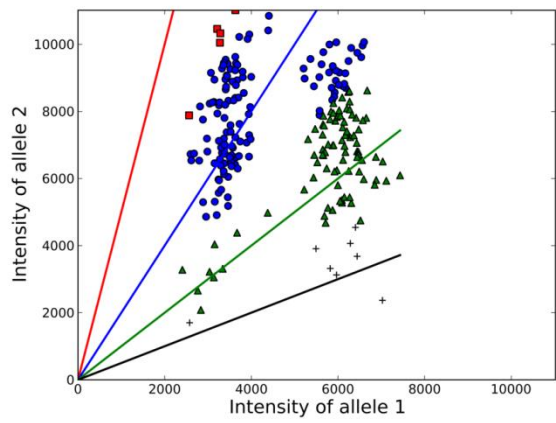

Supplement: 12864_2016_2926_MOESM6_ESM.pdf [file 12864_2016_2926_MOESM6_ESM.pdf]
